# Supplementary material
Source: publisher figshare collection journal article supplement (https://asha.figshare.com/articles/dataset/_/6912242)
Supplement: Supplementary file 1 [file 1]

### Examples of Types of Gestures Coded in the Study

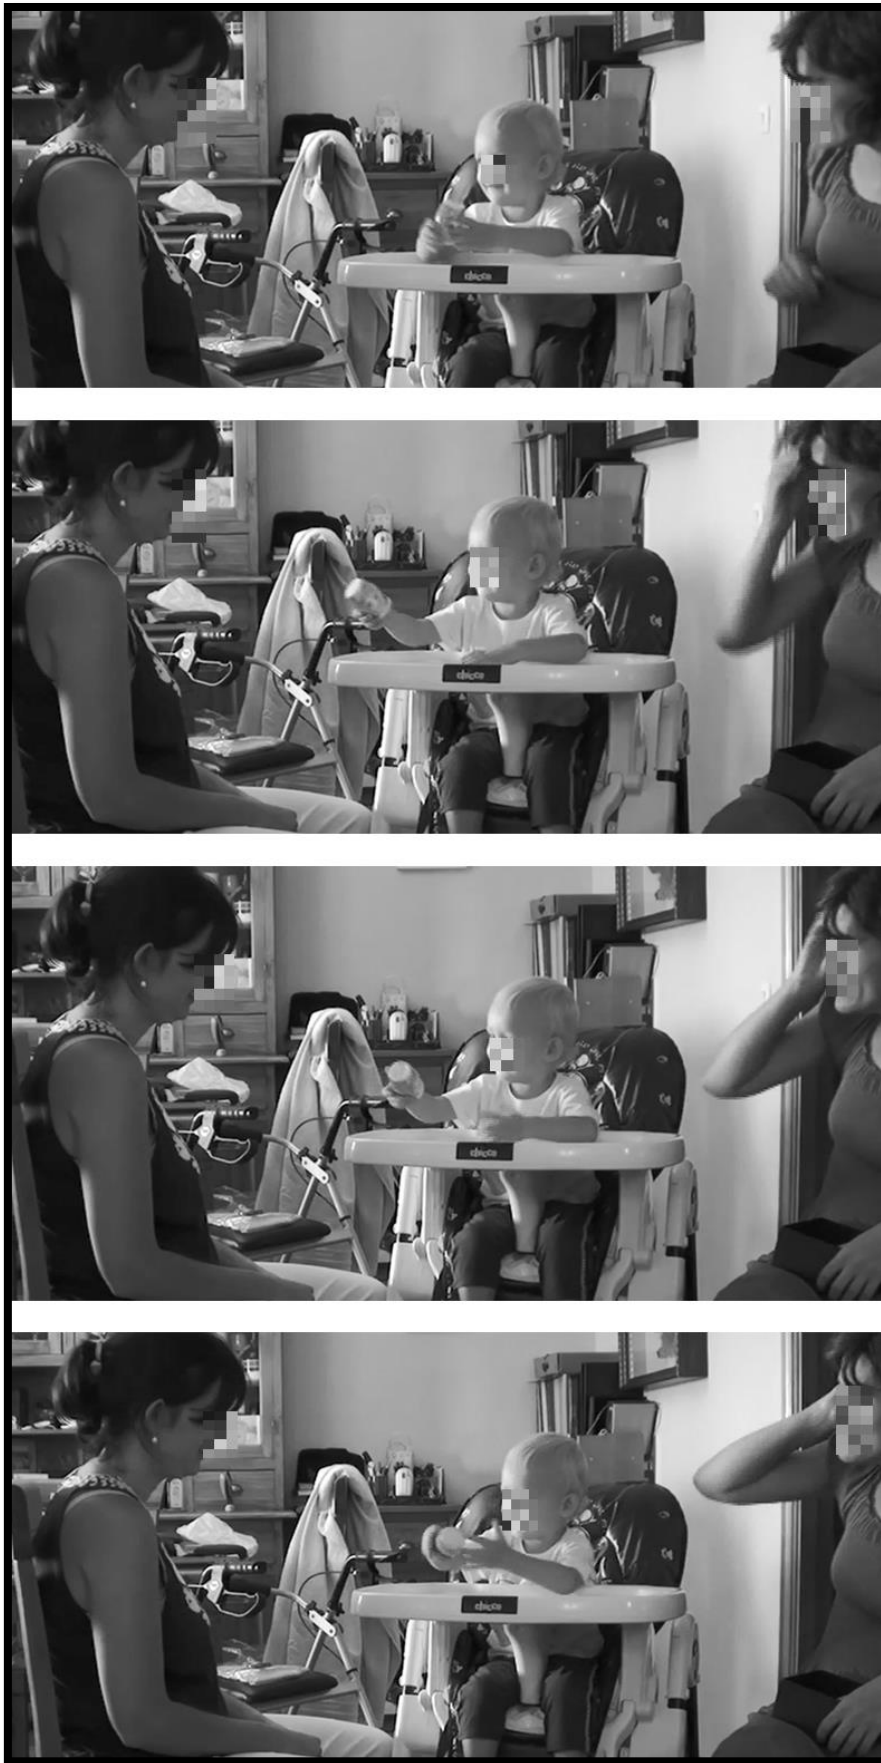

Supplemental Material S3. Example of showing gesture.
