# Supplementary material
Source: publisher figshare collection journal article supplement (https://asha.figshare.com/articles/dataset/_/6912242)
Supplement: Supplementary file 8 [file 1]

## Examples of Types of Gestures Coded in the Study

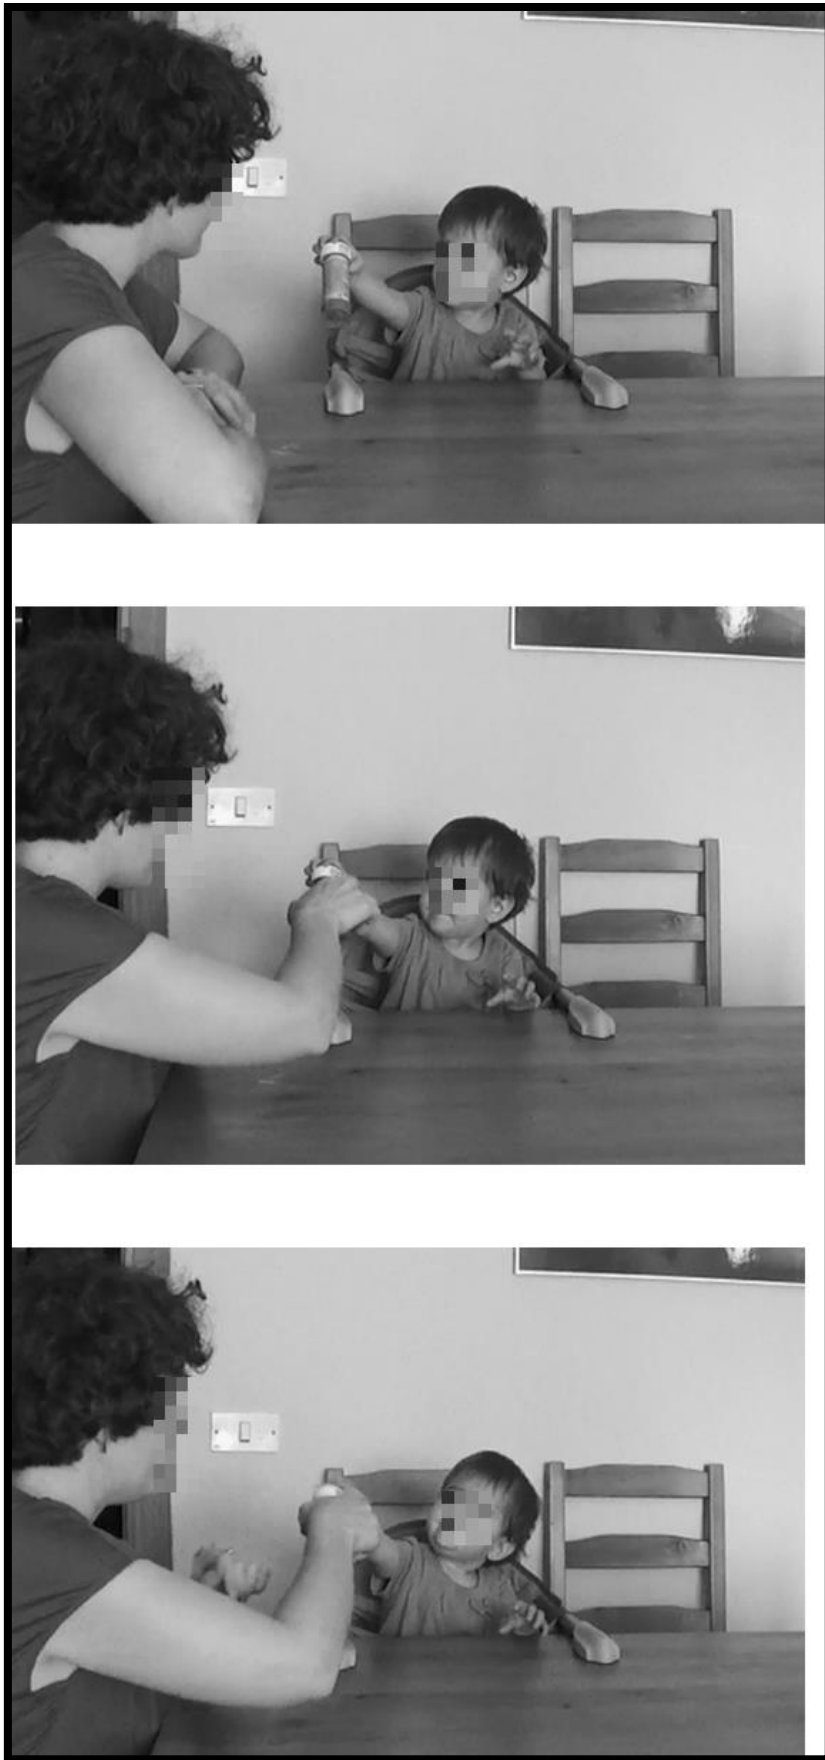

Supplemental Material S4. Example of give gesture.
