# Supplementary material
Source: publisher figshare collection journal article supplement (https://asha.figshare.com/articles/dataset/_/6912242)
Supplement: Supplementary file 9 [file 1]

## Examples of Types of Gestures Coded in the Study

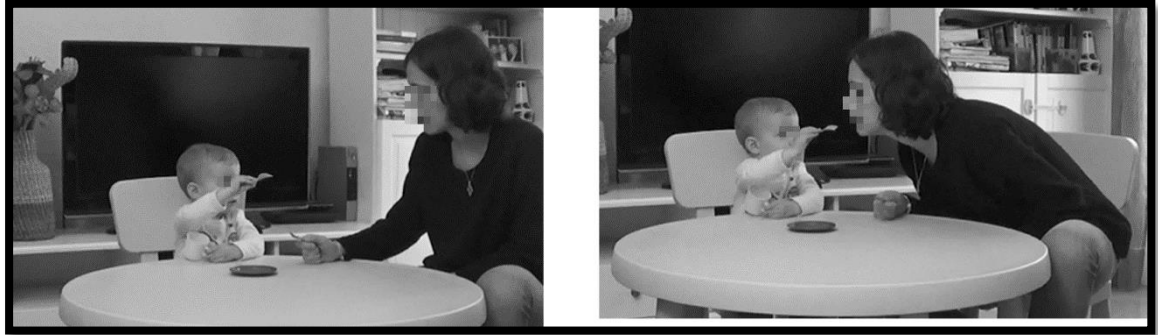

Supplemental Material S9. Sequence of the stroke phase of the gesture. The expression of the gesture is fully accomplished, indicating where the attention of the observer is intended to go.
