# Supplementary material
Source: publisher figshare collection journal article supplement (https://asha.figshare.com/articles/dataset/_/6912242)
Supplement: Supplementary file 10 [file 1]

### Examples of the Phases of Gestures Coded in the Study

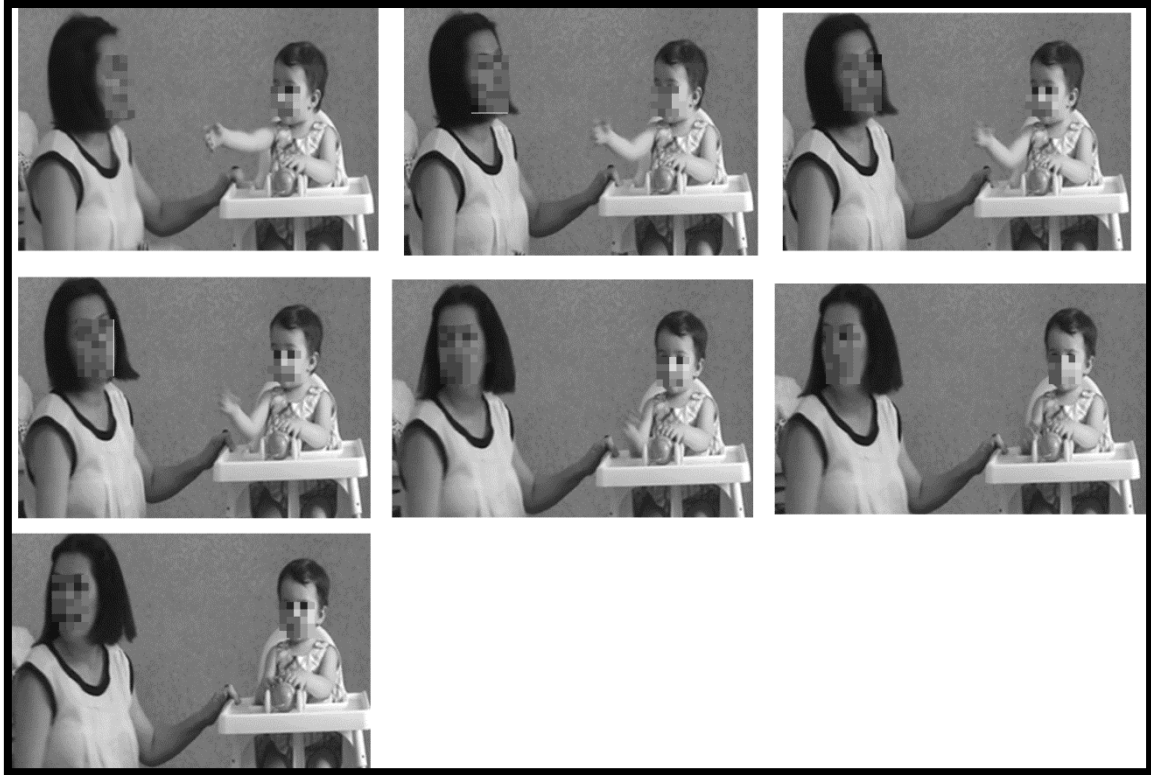

Supplemental Material S10. Sequence of the retraction phase of the gesture. The arm moves from the stroke position until the initial rest position.
